# Supplementary material for: Quantifying selective metabolite transport for the bacterial microcompartment from Haliangium ochraceum with molecular dynamics simulations
Source: Royal Society of Chemistry journal article supplement (doi:10.1039/d5nr03156g), 2026-01-01
Supplement: d5nr03156g1.pdf [file d5nr03156g1.pdf]

# **Supporting Information:**

## **Quantifying Selective Metabolite Transport for the Bacterial Microcompartment from *Haliangium ochraceum* with Molecular Dynamics Simulations**

Neetu S. Yadav,<sup>†</sup> Saad Raza,<sup>†</sup> Yali Wang,<sup>‡</sup> Joel F. Landa,<sup>¶</sup> Eric L. Hegg,<sup>§,¶</sup>

Robert P. Hausinger,<sup>‡,§</sup> and Josh V. Vermaas<sup>\*,†,§</sup>

<sup>†</sup>*MSU-DOE Plant Research Laboratory, Michigan State University, East Lansing MI,  
48824, USA*

<sup>‡</sup>*Department of Microbiology, Genetics, and Immunology, Michigan State University, East  
Lansing, MI, 48824, USA*

<sup>¶</sup>*Cell and Molecular Biology Program and Molecular Plant Sciences Program, Michigan  
State University, East Lansing, MI, 48824, USA*

<sup>§</sup>*Department of Biochemistry and Molecular Biology, Michigan State University, East  
Lansing, Michigan 48824, USA*

E-mail: vermaasj@msu.edu

Phone: +1 (517) 884-6937

### **Simulation Time for each of the molecules**

REUS simulations were run for each molecule for 128 replicas.

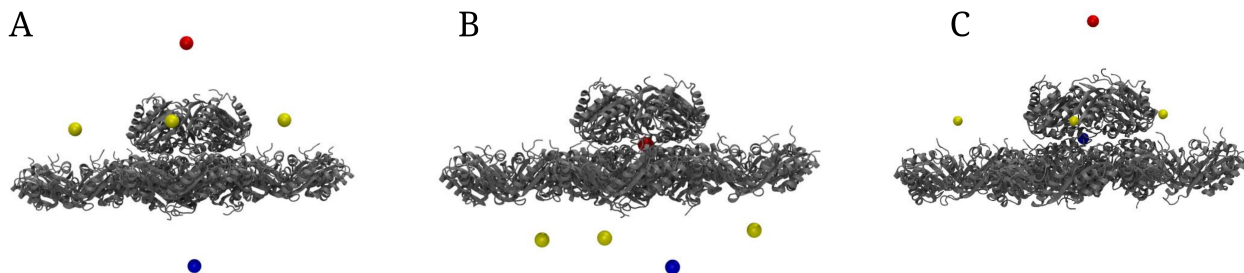

Figure S1: Steered molecular dynamics simulations were performed to pull metabolites using a force constant of 5 kcal/(mol·Å<sup>2</sup>) along the Z-axis. Panel A- illustrates the initial configuration, showing the placement of metabolites: two were positioned on each side of the BMC-T unit, and three were placed above the hexameric unit. Panel B- represents the first pulling step. Here, the metabolites positioned above the hexamer were moved from +30 Å to -30 Å along the Z-axis. Simultaneously, the metabolites near the trimer were pulled from +60 Å toward the center of the trimeric pore, while the metabolites located below the structure were kept fixed. Panel C- depicts the second step, where the hexamer-associated metabolites were pulled back from -30 Å to +30 Å, and the trimer-associated metabolites were moved upward along the Z-axis.

Table S1: Simulation time for the selected metabolites. The aggregate time indicates the time for each replica.

| Compound                           | Time (ns) | Aggregate time ( $\mu$ s) |
|------------------------------------|-----------|---------------------------|
| 2-aminophenol                      | 80        | 10.24                     |
| 2-aminomuconic acid-6-semialdehyde | 80        | 10.24                     |
| 2-aminomuconate-6-semialdehyde     | 80        | 10.24                     |
| Picolinic acid                     | 80        | 10.24                     |
| Picolinate                         | 80        | 10.24                     |
| Ammonium                           | 80        | 10.24                     |
| Nitrite                            | 80        | 10.24                     |
| Dithionite                         | 150       | 19.2                      |



## Accessing the PMF Convergence

To obtain a better estimate of the convergence of the PMF, the data were divided into various time chunks. Figures S2 and S3 plot the free energies the molecules, in different time slabs.

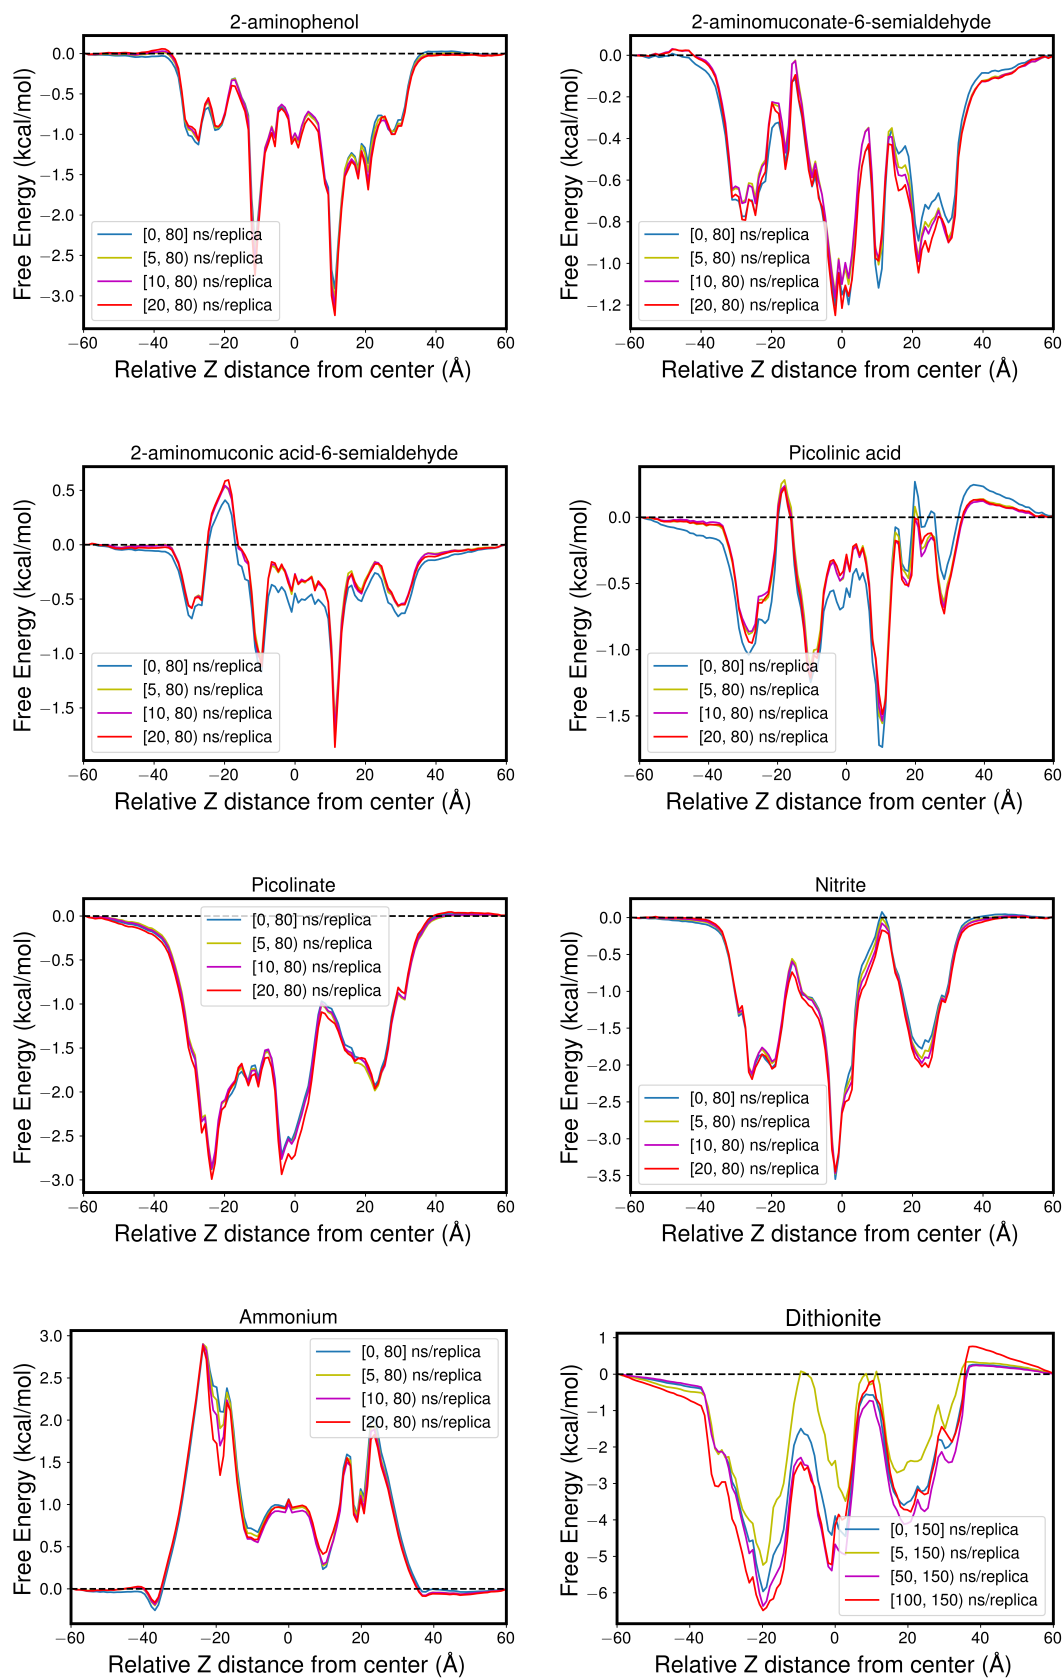

Figure S2: PMF convergence for metabolites across the stacked trimers. The color code for the data is mentioned in the plot. The name of the molecule is mentioned on the top.

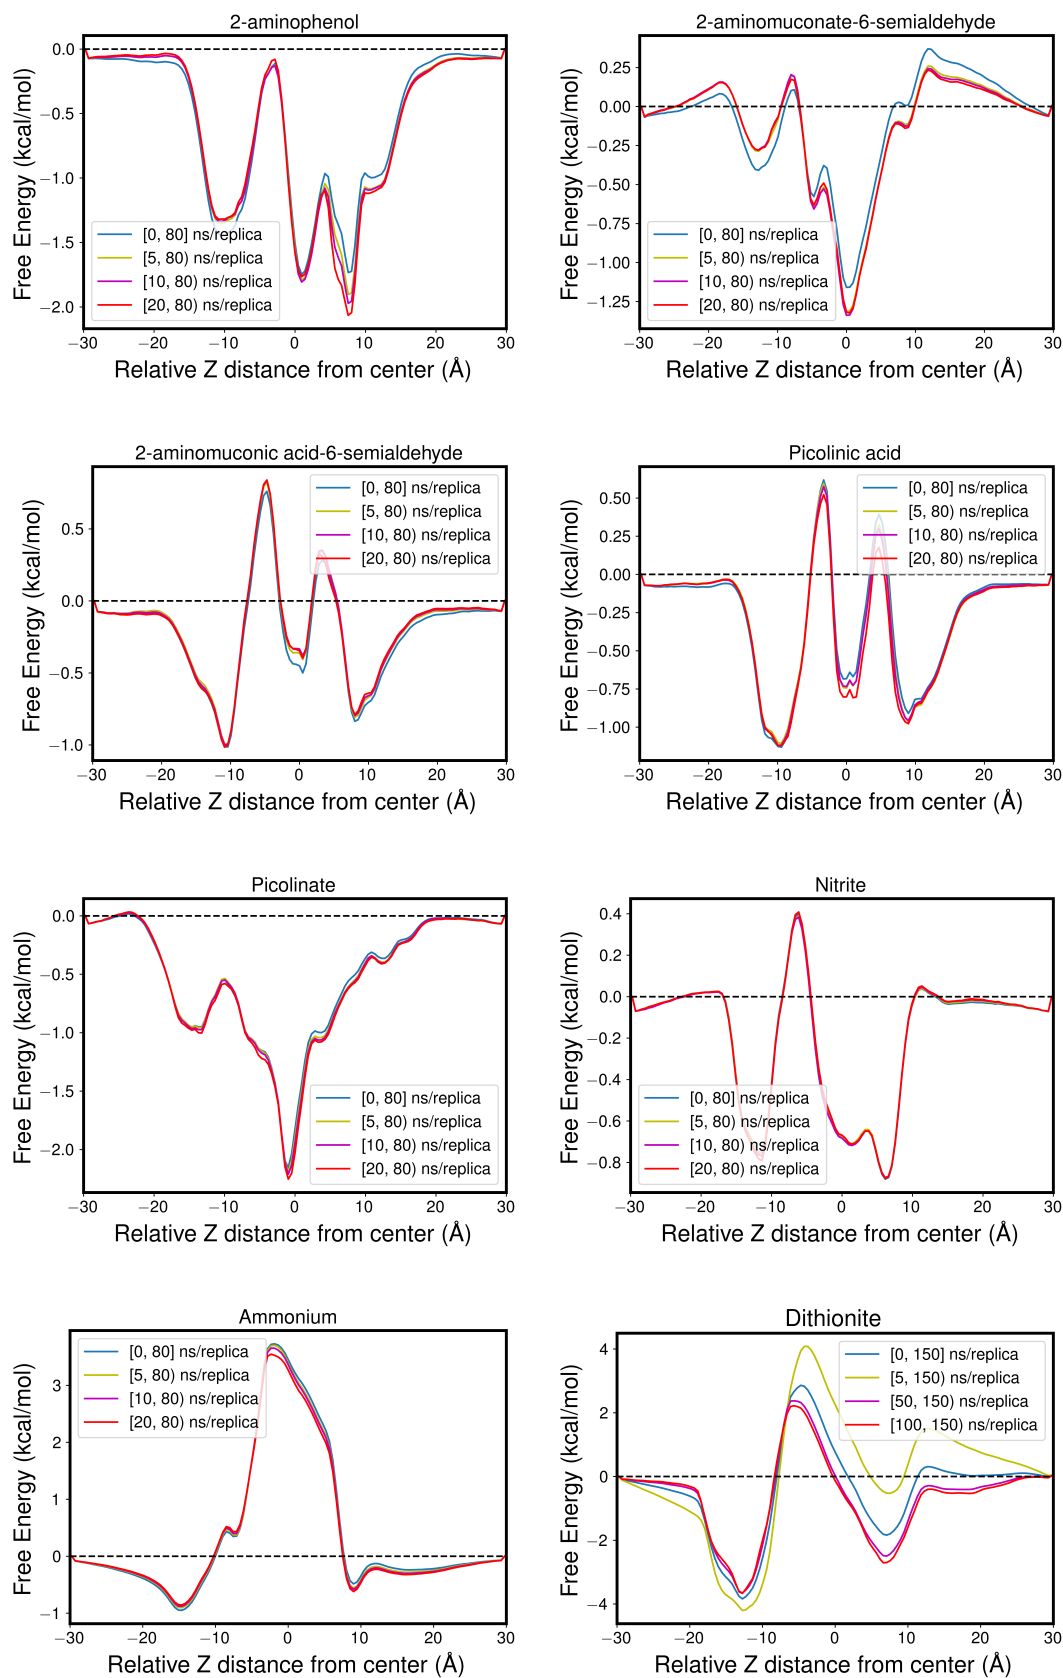

Figure S3: PMF convergence for metabolites across hexamers. The color code for the data is mentioned in the plot. The name of the molecule is mentioned on the top.

Table S2: Water interaction energy for dithionite from QM and MM before and after optimization.

| Interactions |       | Interaction Energy (kcal/mol) |                   |                      |
|--------------|-------|-------------------------------|-------------------|----------------------|
| Ligand Atom  | Water | QM                            | MM Diff<br>CGenFF | MM Diff<br>Optimized |
| O1           | LN1   | -21.557                       | 3.692             | -0.475               |
| O1           | LN2   | -21.472                       | 3.473             | -0.771               |
| O2           | LN1   | -21.557                       | 3.692             | -0.475               |
| O2           | LN2   | -21.472                       | 3.474             | -0.770               |
| O3           | LN1   | -21.480                       | 3.481             | -0.763               |
| O3           | LN2   | -21.561                       | 3.702             | -0.463               |
| O4           | LN1   | -21.479                       | 3.481             | -0.763               |
| O4           | LN2   | -21.561                       | 3.702             | -0.463               |
| RMSE         |       |                               | 3.588             | 0.635                |

Table S3: Water interactions energy for nitrite from QM and MM before and after optimization.

| Interactions |       | Interaction Energy (kcal/mol) |                   |                      |
|--------------|-------|-------------------------------|-------------------|----------------------|
| Ligand Atom  | Water | QM                            | MM Diff<br>CGenFF | MM Diff<br>Optimized |
| O1           | LN1   | -14.957                       | -10.991           | 0.252                |
| O1           | LN2   | -14.957                       | -10.991           | 0.252                |
| O2           | LN1   | -14.954                       | 7.513             | 0.249                |
| O2           | LN2   | -14.954                       | 7.513             | 0.249                |
| RMSE         |       |                               | 9.414             | 0.250                |

## Extended Method Section

### Parameter Optimization

Initial structures of 2-aminomuconic acid-6-semialdehyde, dithionite, nitrite and picolinic acid were downloaded from the PubChem database. All of the compounds were run through CGenFF to obtain initial parameters. Charges and some dihedral parameter penalty scores were substantially higher, and therefore these parameters were refined through the standard

Table S4: Water interactions energy for 2-aminomuconic acid-6-semialdehyde from QM and MM before and after optimization.

|              |       | Interaction Energy (kcal/mol) |                   |                      |
|--------------|-------|-------------------------------|-------------------|----------------------|
| Interactions |       | QM                            | MM Diff<br>CGenFF | MM Diff<br>Optimized |
| Ligand Atom  | Water |                               |                   |                      |
| O1           | LN1   | -4.005                        | -0.309            | -0.889               |
| O1           | LN2   | -4.481                        | -0.329            | -0.112               |
| O1           | LP2   | -5.249                        | 1.154             | 0.784                |
| O2           | LN1   | -3.342                        | -1.150            | -0.763               |
| O2           | LN2   | -2.999                        | -1.059            | -0.404               |
| O2           | LP1   | -3.769                        | -1.374            | -0.856               |
| O2           | LP2   | -3.407                        | -1.118            | -0.298               |
| O3           | LN1   | -5.010                        | -1.171            | -0.601               |
| O3           | LN2   | -4.961                        | -1.197            | -0.617               |
| O3           | LP1   | -6.691                        | -0.684            | 0.687                |
| O3           | LP2   | -6.933                        | -0.049            | 0.599                |
| H3           | 90    | -6.123                        | 0.962             | 0.486                |
| H5           | 90    | -1.547                        | -0.174            | 0.505                |
| H6           | 90    | -4.357                        | 1.005             | 0.500                |
| H11          | 0     | -7.939                        | 1.418             | 1.132                |
| H11          | 90    | -7.331                        | 1.018             | 0.758                |
| H12          | 0     | -7.569                        | 0.479             | 0.336                |
| H12          | 90    | -7.569                        | 0.363             | 0.209                |
| RMSE         |       |                               | 0.938             | 0.6373               |

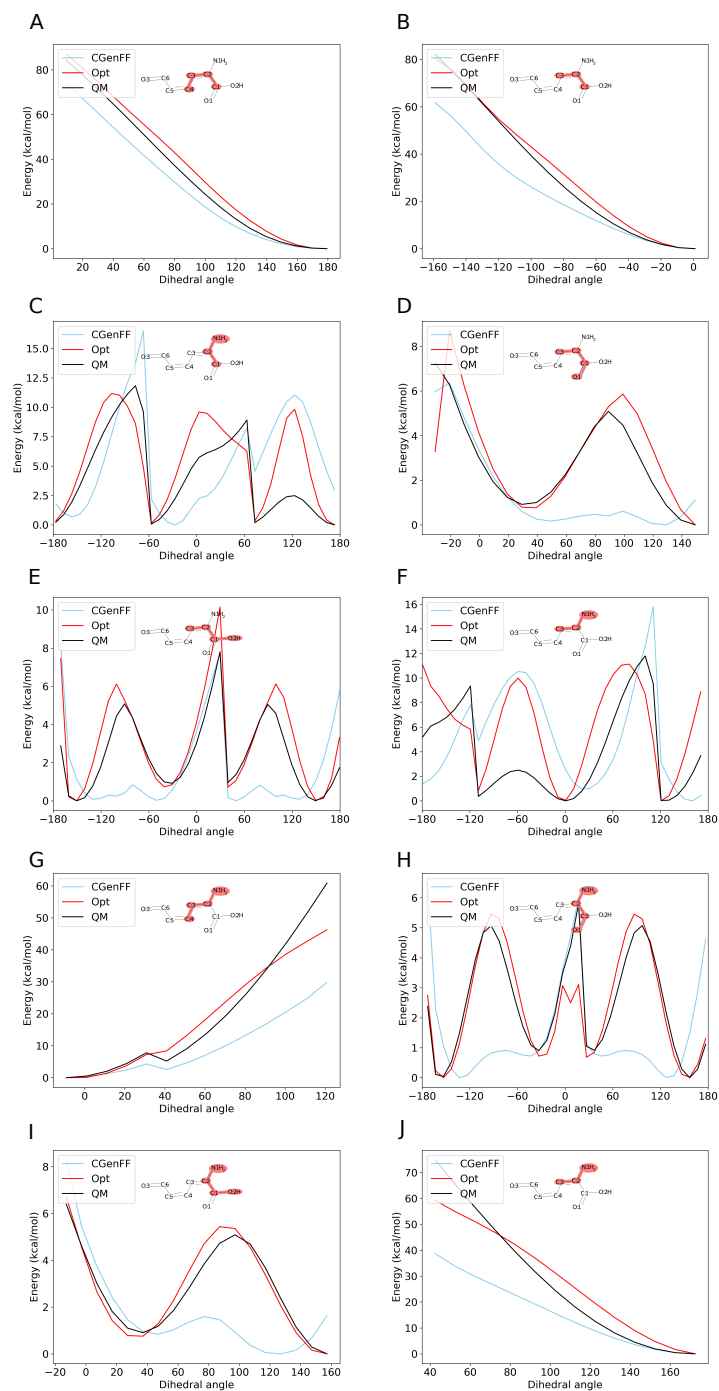

Figure S4: Dihedral free energy scans for 2-aminomuconic acid-6-semialdehyde done by QM calculation (black), through CGenff parameters (light blue) and optimized parameters (red). The exact dihedral being optimized is highlighted in red within the molecular structure shown as a plot inset.

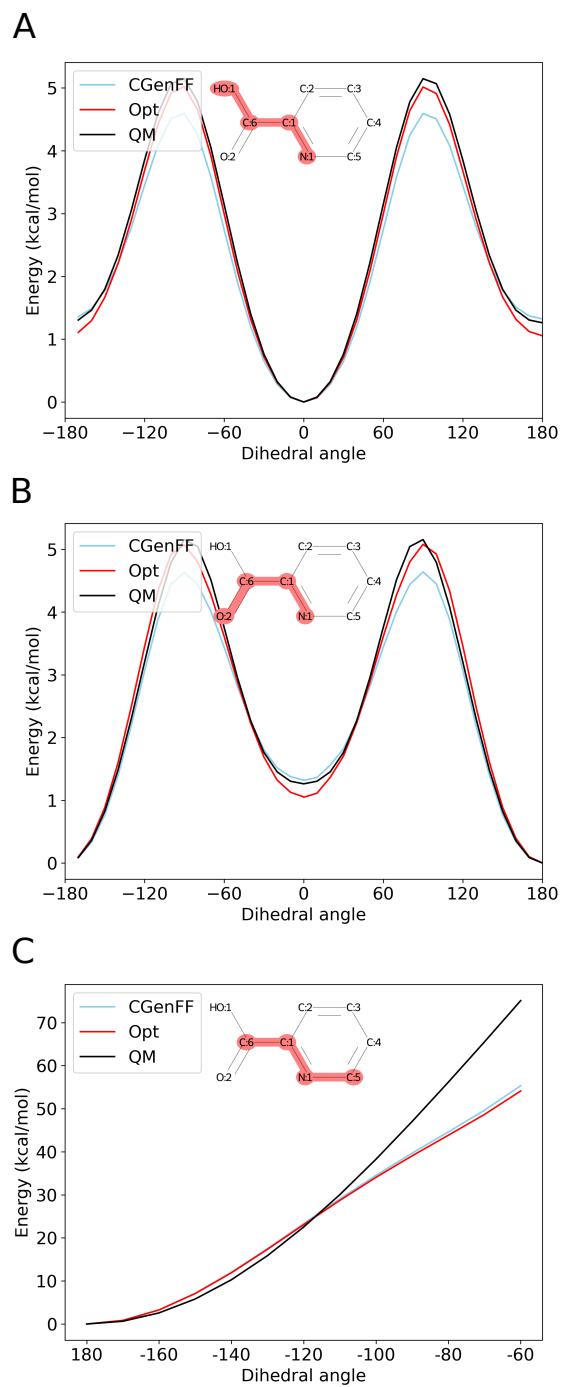

Figure S5: Dihedral free energy scans for picolinic acid done by QM calculation (black), through CGenff parameters (light blue) and optimized parameters (red). The exact dihedral being optimized is highlighted in red within the molecular structure shown as a plot inset.

Table S5: Water interactions energy for picolinic acid from QM and MM before and after optimization.

| Interactions |       | Interaction Energy (kcal/mol) |                   |                      |
|--------------|-------|-------------------------------|-------------------|----------------------|
|              |       | QM                            | MM Diff<br>CGenFF | MM Diff<br>Optimized |
| Ligand Atom  | Water |                               |                   |                      |
| O1           | LP1   | -0.956                        | -0.519            | -0.277               |
| O1           | LP2   | -0.956                        | -0.519            | -0.277               |
| O2           | LN1   | -4.978                        | -0.287            | -0.311               |
| O2           | LN2   | -4.978                        | -0.287            | -0.311               |
| O2           | LP1   | -6.652                        | -0.199            | -0.237               |
| N            | LN1   | -4.582                        | 1.693             | -0.084               |
| N            | LN2   | -4.582                        | 1.693             | -0.084               |
| H2           | 90    | -1.183                        | 0.655             | 0.354                |
| H3           | 90    | -3.053                        | 1.469             | 0.472                |
| H4           | 90    | -2.958                        | 0.925             | 0.276                |
| H5           | 90    | -2.040                        | -0.277            | 0.276                |
| H6           | 90    | -7.601                        | -0.308            | -0.154               |
| RMSE         |       |                               | 0.916             | 0.280                |

optimization protocol for CHARMM. Partial charges optimization protocol was to map the water interaction energy between QM and MM calculation to adjust the partial charges in MM parameters.

Multiple water interaction site geometries were generated by FFparam to cover the water interaction energy. Water molecule is oriented in 4 different orientations around oxygen atom by FFparam, two oriented towards the oxygen lone pair (LP1 and LP2), and two oriented linearly towards the oxygen atom (LN1 and LN2). LP1 and LP2 are oriented with respect to the two different lone pairs on oxygen atom. LN1 and LN2 represent the 180° flip orientation of the second hydrogen atom in the water. For hydrogen atom the water molecule is placed in a 90° orientation. Water conformation with steric clash were avoided for charge optimization. Water interaction energies in QM were calculated at Hartee-Fock level of theory. These are interactions were compared with MM energy value to optimize the partial charges. Standard partial charges of +0.419, +0.21, +0.15, +0.115 and +0.09 were used for hydroxyl, terminal alkene, non terminal alkene, aromatics and alkane hydrogens respectively for these molecules



to maintain compatibility with existing forcefield parameters. The charges on non-hydrogen atoms were redistributed to perform the optimization.

Dihedral potential energy scans are the next step in fitting the forcefield parameters through QM derived potential energy surface (PES). PES is done by scanning the optimized geometry in QM and repeating the scans while changing the dihedral angle. MM energies and QM scan energies overlap is induced by optimizing the dihedral bonded parameters. We modify the force constant, phase and multiplicity for the cosine terms to optimize the dihedral bonded parameters. Initial fitting was done with LSFITPAR with variations of multiplicities to find the least root mean square error (RMSE). Manual tweaking of parameters was done to further minimize the RMSE value (Figure S4, S5)

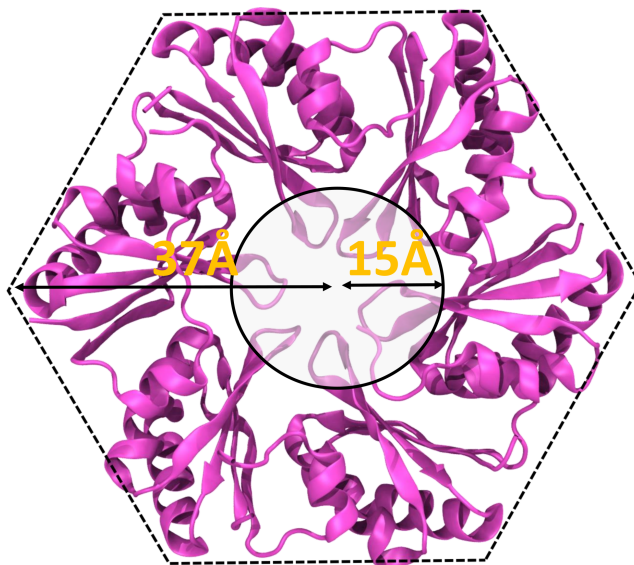

Figure S6: Pictorial representation of the BMC-H shell, highlighting the restrained region with a radius of 15 Å applied to the metabolite. This restraint was designed to ensure accurate computation of metabolite permeability through the pore region.

## NrfA Plasmid

For the NrfA studies, NrfA from *Geobacter lovleyi* was inserted via Gibson assembly onto a pBAD202/D-TOPO vector (Invitrogen) with the addition of a SpyC001, and a PelB periplasmic localization signal sequence on the N-terminus. Strep-Tag II was added onto the C terminus for purification. SpyC-NrfA was then induced with 0.02% arabinose and expressed in *Shewanella oneidensis* at 30°C for 16 hours. Periplasmic contents were released via sucrose osmotic shock and purified on a Strep-Tactin XT 4Flow column from IBA Lifesciences. We have added the plasmid map for this construct and amino acid sequence of SPyC001-NrfA with NrfA highlighted in Figure S7.

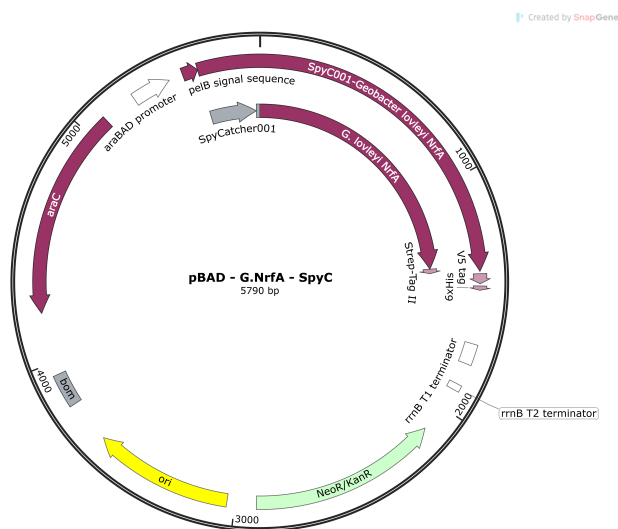

Figure S7: Plasmid construct encoding NrfA gene.

## NrfA Amino Acid Sequence:

DSATHIKFSKRDEDGKELAGATMELRDSSGKTISTWISDGQVKDFYLYPGKYTFVE  
 TAAPDGYEVATAITFTVNEQGQVTVNGSGSGSAPPKAEQAKIAEIPDGTIDPAVWG  
 KNYPEEYQTWKDTALPTPEGKSKYKKGNDGGKVYDKLSEYPFIALLFNGWGFIE  
 YNEPRGHVYMMKDQKEIDPSRLKGGGACLTCKTPYAPQLAQKQGVITYFSQSYAD  
 AVNQIPKEHQEMGVACIDCHNNKDMGLKISRGFTLVKALDKMGVDQTKLTNQDKR

SLVCAQCHVTY TIPKDANMKSQDVFFPWDESKWKGKISIENIIKKMRSDKSYGEWTQ  
AVTGFKMAYIRHPEFEMYSNQSVHWMAGVSCADCHMPYTKVGSKKISDHRIMSPL  
KNDFKGCKQCHSESSEWLKNQVITIQDRAASQYIRSGYALATVAKLFEMTHKQQAA  
GKQIDQKMYDQAKFYEEGFYRNLFFGAENSIGFHNPTTEAMRILGDATMYAGKAD  
GLLRQALTKAGVDVPVKIDLELSKYTNNRGAKKLMFKPEQELKDPYGPQKWSHPQ  
FEK

## T1-AmnA and AmnB Plasmids

For the AmnAB studies, two plasmids were created by Gibson assembly. Plasmid H-T1-AmnA-T2T3P has the gene encoding AmnA inserted into the gene encoding BMC T1 so the fusion protein positions AmnA on a loop of T1 located inside the shell. This plasmid also carries genes encoding BMC components H, T2, T3, and P. Plasmid AmnB contains the gene encoding AmnB. The two plasmids were co-expressed in *E. coli* cells to produce BMC-encapsulated AmnAB.

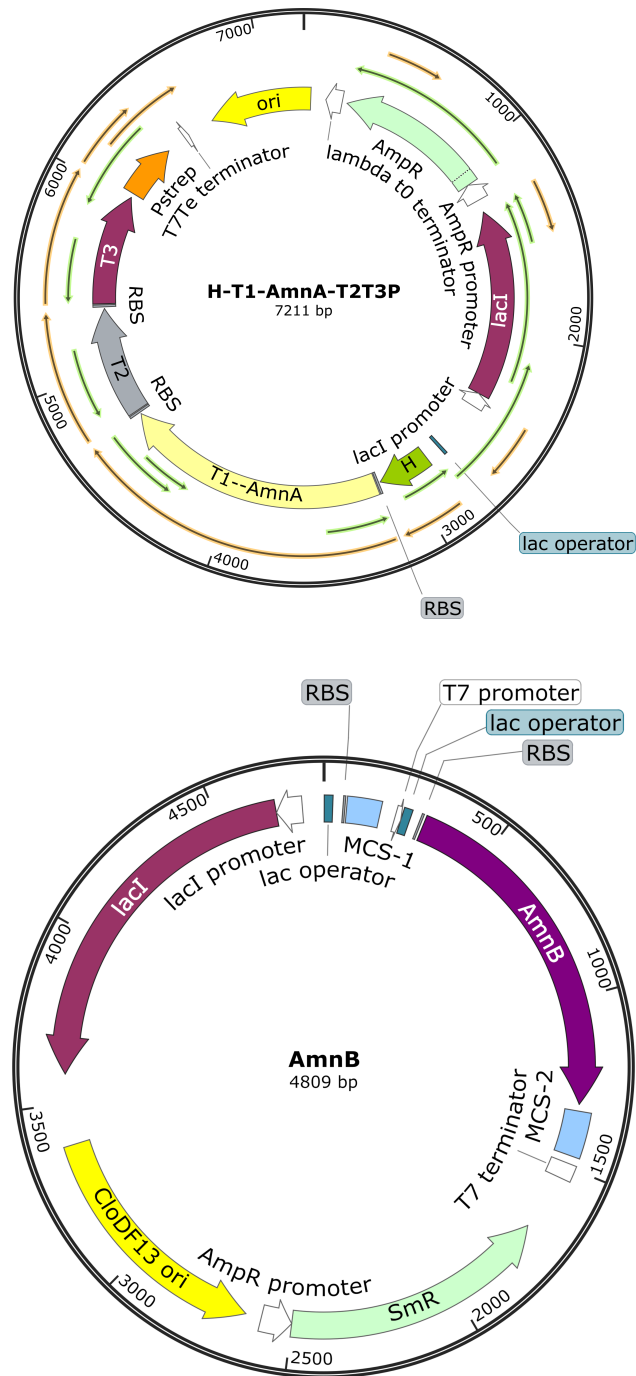

Figure S8: Plasmids encoding T1-AmnA, AmnB and BMC components.

## T1-AmnA and AmnB Sequence

The protein sequences of the T1-AmnA fusion protein (with AmnA highlighted in yellow) and AmnB are shown below.

### T1-AmnA:

|                                                       |     |
|-------------------------------------------------------|-----|
| MDHAPERFDATPPAGEPDRPALGVLELTSIARGITVADAALKRAPSLLLM    | 50  |
| SRPVSSGKHLMMRGQVAEVEESMIAAREIAGAGGGSGGS               | 100 |
| MADRTGIVAG                                            |     |
| ALLPGMPHLLAEHPAPSWSALAGAARDVGARLRRLEPDVLLLLSTQWFTV    | 150 |
| LGHQFQCDPNPRGEHVDENWYAYDYGLLDYDLRFDVDFTERWADRVQAGG    | 200 |
| MQARRTRYDGFIDTGTIVTSALLDPDRRLRWAQVSCNLYADADTLADVG     | 250 |
| RAGAAAARDAGLRAAVVVVTGMSSGLIQQWIEPGQDRIGEPGHDQWNTRV    | 300 |
| LDLLTAGKVDEVLAVREDFARQAQADSQFRALFAAGAEATTGPAHLHAY     | 350 |
| GPIWGTGA AVL SWNL PDHP                                | 400 |
| GGSGGGALLDELELPYAHEQLWRFLDAPVVA                       |     |
| DAWEEDTESV I I VETATVCAAIDSADAALKTAPVVLRDMRLAIGIAGKAF | 450 |
| FTLTGELADVEAAA EVVRERCGARLLELACIARPVDELRGRLFFGGSGGH   | 500 |
| HHHHH                                                 | 505 |

## AmnB:

|                                                    |     |
|----------------------------------------------------|-----|
| MSRVFRVPLAPTRGGATTAPRTPAPAPAPTRPGIVAGCLSPHPPHLYGE  | 50  |
| NPPQNEPRSTGGWETLRWAYERLRARIRDVHKPDVLIVHAPHWITMVGHH | 100 |
| VNCVPNPRGLSVEPIFPHLFRYRYDFRTDVELGEAIAEEASGLGLVTRTL | 150 |
| RDPRVRVDYATIGALHLANPAWDIPVVSLSANNNPYFYSDASLTEMVLG  | 200 |
| EATRLAVEATGRRVLLASNSLSHLHWHEEPEDMEREHYPYNNHQYRW    | 250 |
| DMKLLEAIRRGPTAPLRDLIPEHIEATASETKAGSLTWMLAAMGWPKVAG | 300 |
| DVLGYGTIIGTGNAIVEWLPEGSHHGGSGGSHHHHHH              | 337 |

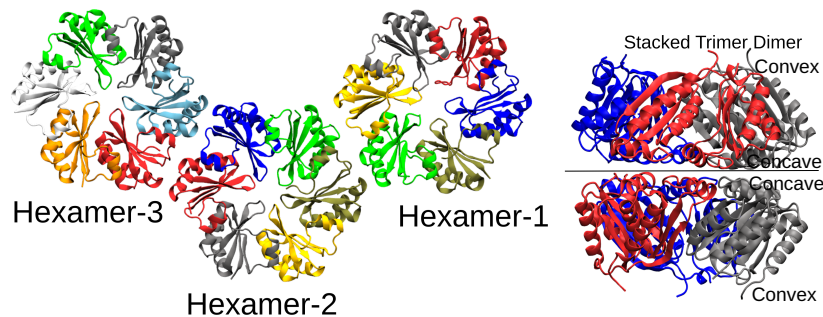

Figure S9: Illustrative representation of the hexamer and trimers. All the chains of hexamers and stacked trimers are colored distinctly for clarity. Both assemblies exhibit concave and convex surfaces, as indicated in the figure for trimer.

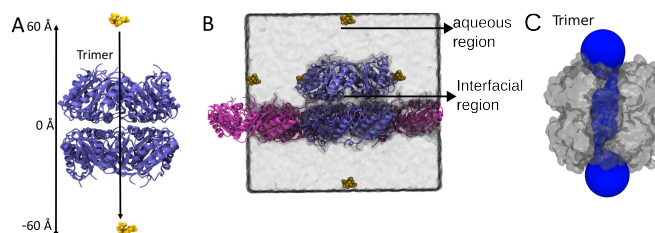

Figure S10: A) Pictorial representation of the BMC-T shell highlighting the stacked trimer dimers. (B) Visualization of the BMC hexamer and the stacked BMC trimer together with the metabolites in the solvated simulation box, providing a sense of scale and illustrating the top, bottom, and interfacial aqueous regions. (C) Illustration of the third aqueous region running through the protein core.



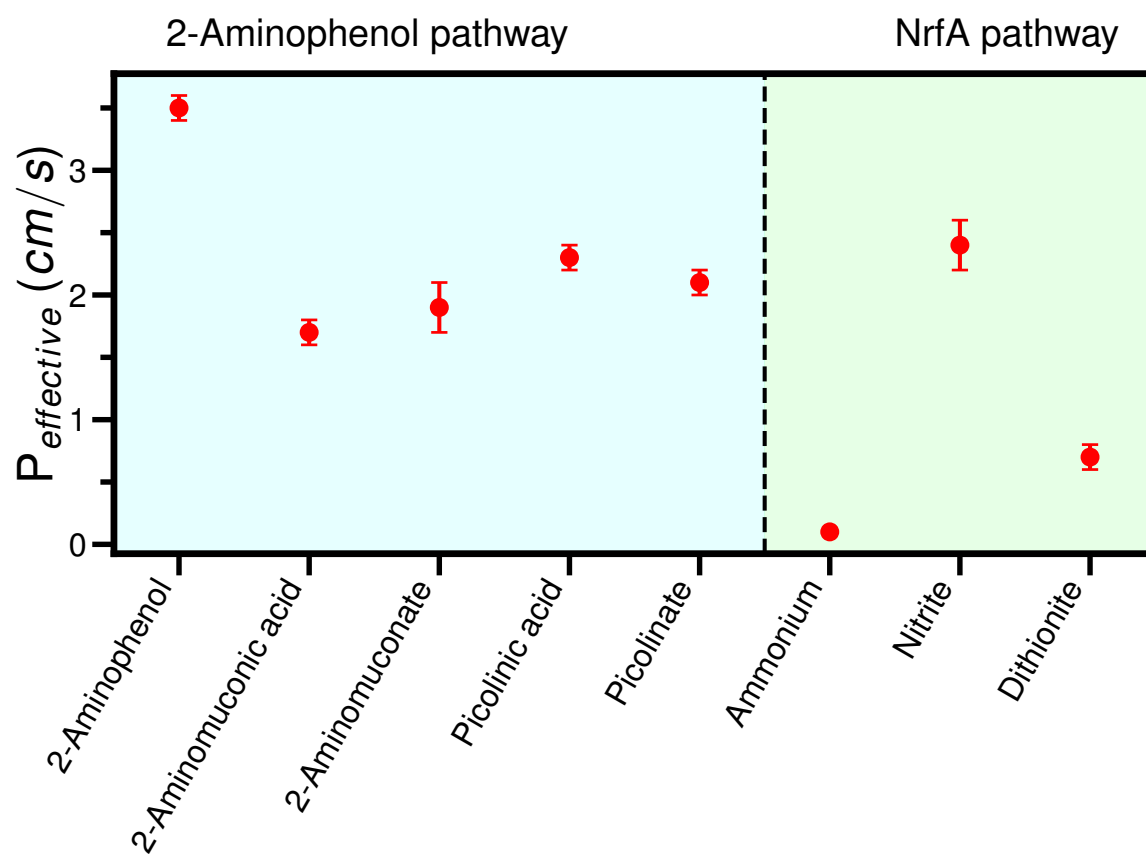

Figure S11: Effective permeability of metabolites across the hexamer and trimeric pore.

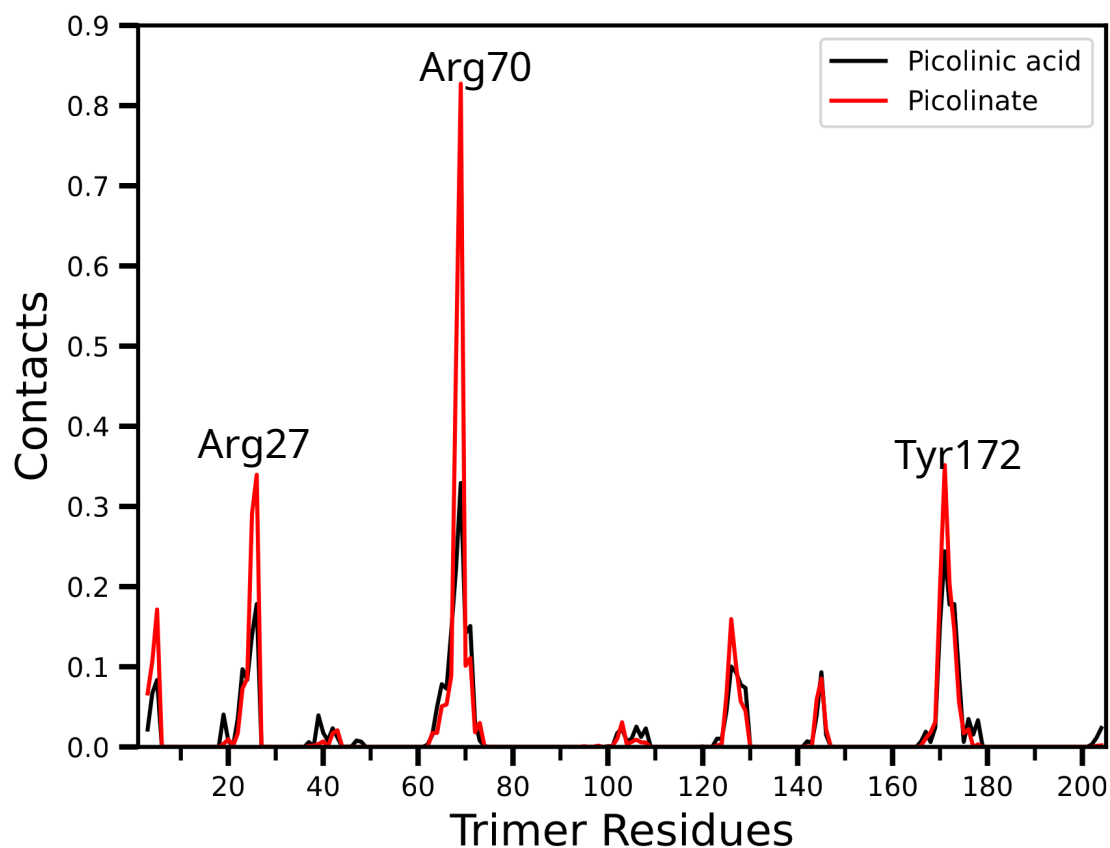

Figure S12: Number of contacts formed between picolinate, picolinic acid and BMC-T<sup>SD</sup> residues. BMC-T forms a stacked trimer (Fig. S9) composed of three identical protomer subunits. For clarity, all contacts are mapped onto a single representative monomer. Contact frequencies were normalized across all trajectory frames and symmetrically equivalent monomeric unit.

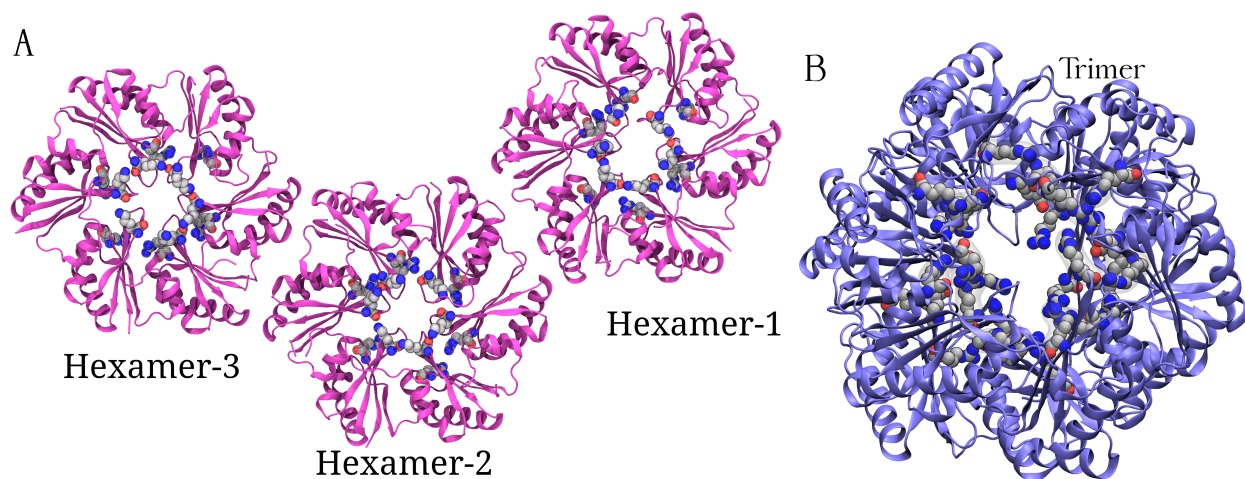

Figure S13: Basic amino acids lining the (A) hexameric and (B) stacked trimeric pores.

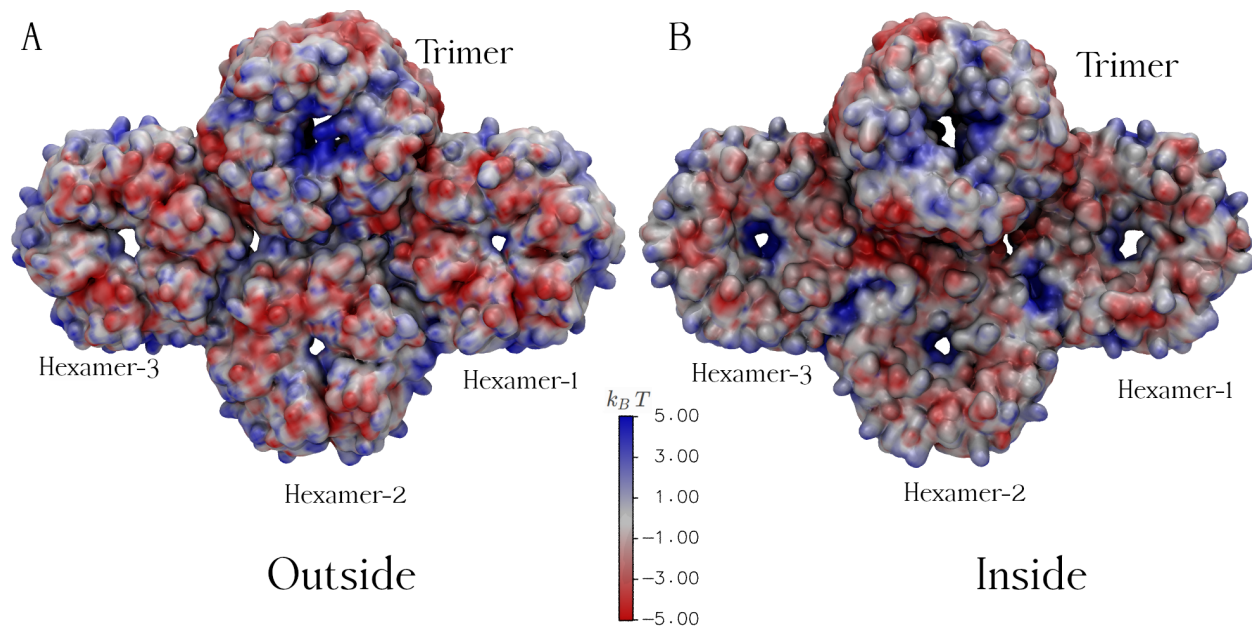

Figure S14: Electrostatics of HO shell. A, Surface as seen from the outside colored by electrostatic potential (red, negative; blue, positive) B, Same as A, but for the inside view. The scale bar below indicates the range from -5 to +5  $k_B T$ .

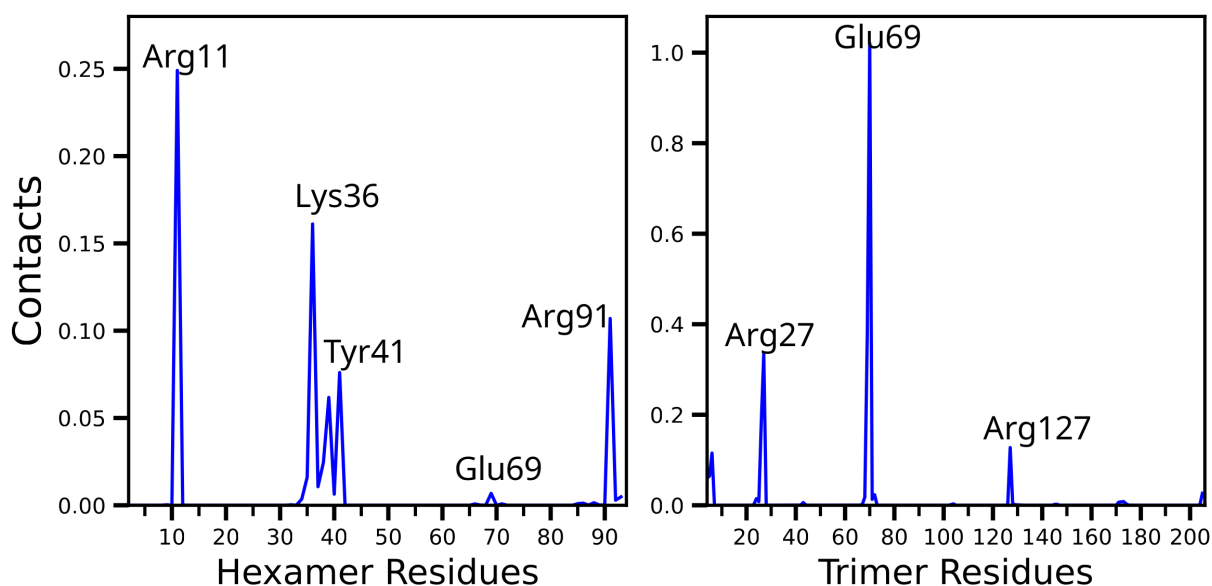

Figure S15: Number of contacts formed between dithionite and BMC-H and BMC-T residues. The BMC shell contains three hexamers, each composed of six identical protomer subunits. (Fig. S9), while the trimer is composed of three repeating monomeric units. For clarity, all contacts are projected onto a single representative monomer. Contact frequencies were normalized over all trajectory frames and symmetrically equivalent monomeric units.

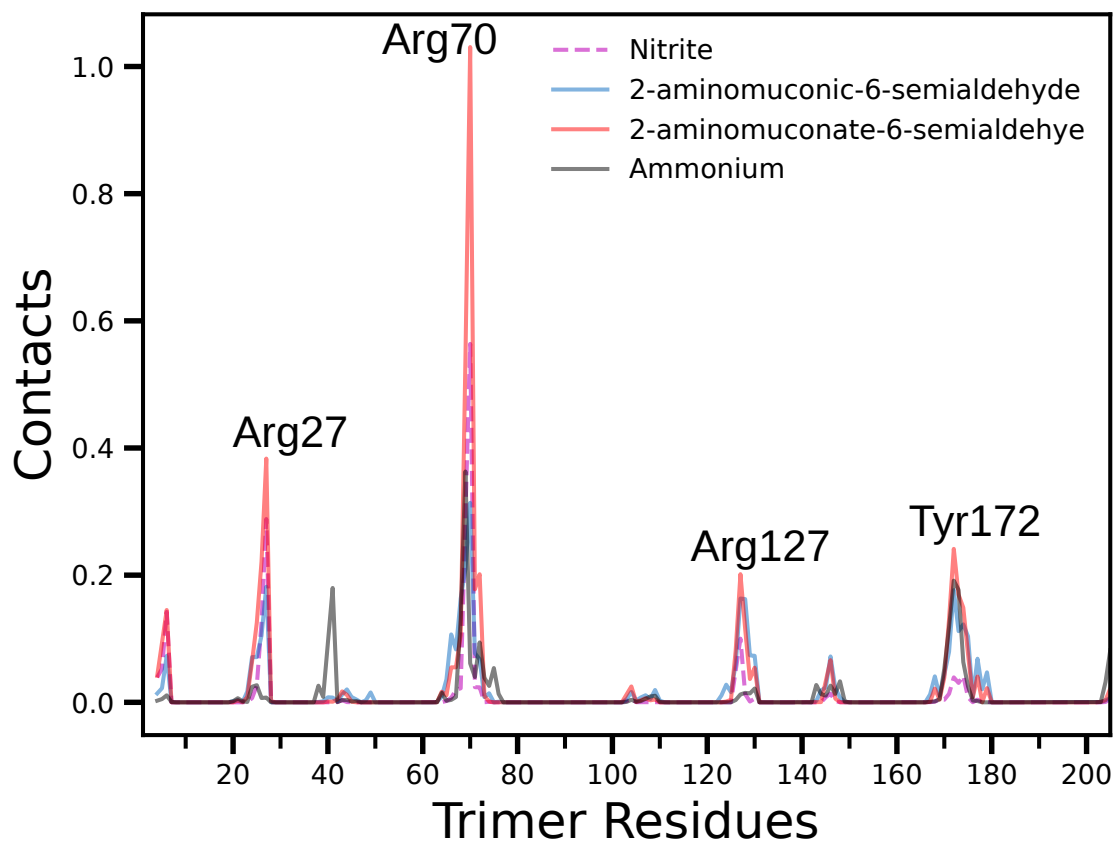

Figure S16: Number of contacts formed between nitrite, ammonium, 2-aminomuconic acid-6-semialdehyde and 2-aminomuconate-6-semialdehyde with BMC-T residues. BMC-T forms a stacked trimer (Fig. S9) composed of three identical protomer subunits. For clarity, all contacts are mapped onto a single representative monomer. Contact frequencies were normalized across all trajectory frames and symmetrically equivalent monomeric unit.

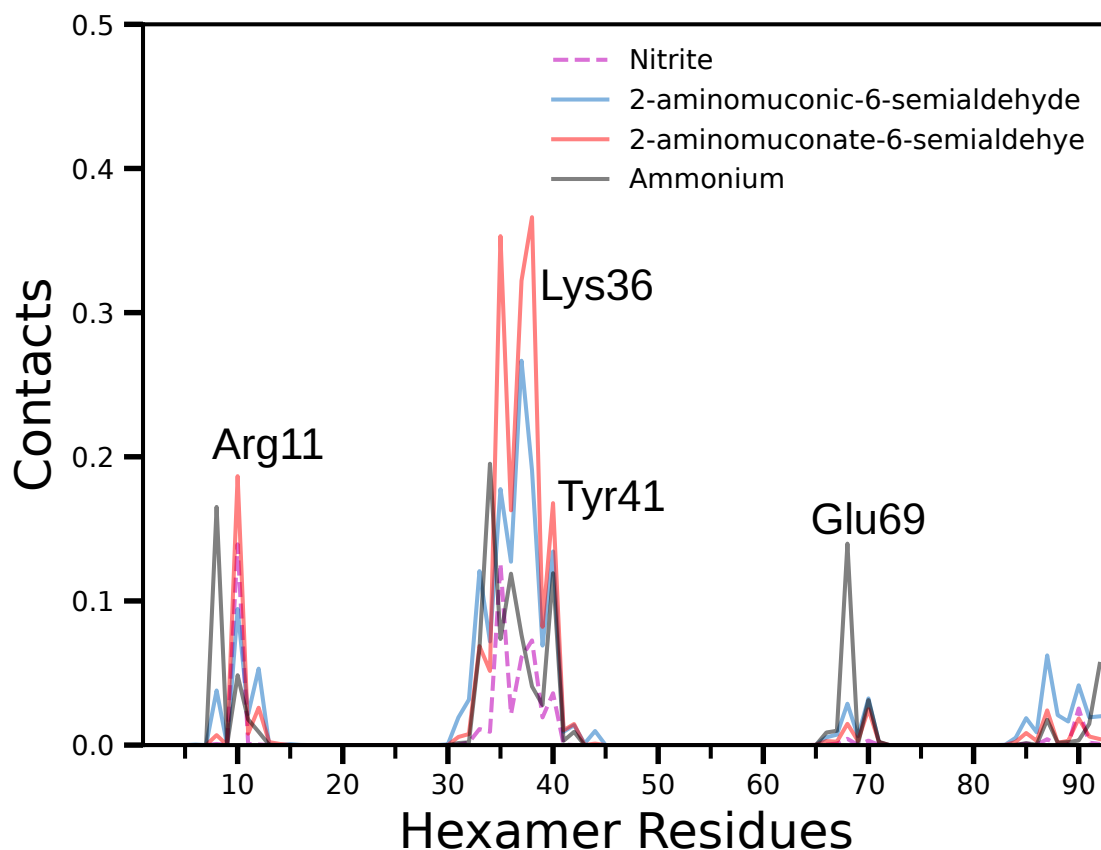

Figure S17: Number of contacts formed between nitrite, ammonium, 2-aminomuconic acid-6-semialdehyde and 2-aminomuconate-6-semialdehyde with BMC-H. The BMC shell contains three hexamers, each composed of six hree identical protomer subunits. (Fig. S9). For clarity, all contacts are projected onto a single representative monomer. Contact frequencies were normalized over all trajectory frames and symmetrically equivalent monomeric units.
